# Supplementary material for: Factors Influencing Second and Third Dose Observance during Seasonal Malaria Chemoprevention (SMC): A Quantitative Study in Burkina Faso, Mali and Niger
Source: MDPI journal article supplement (doi:10.3390/tropicalmed7090214), 2022-08-29
Supplement: s1 [file s1]

## Annexe A : Fiche de collecte des informations

### Enquête sur les facteurs influençant l'observance des 2<sup>em</sup> et 3<sup>em</sup> dose de CPS

#### Renseignements sur les enfants

Prénom et nom de l'enfant :

Date de naissance ou âge de

l'enfant : Sexe : 1 ☐ M 2 ☐ F

Numéro ID de l'enfant : / \_\_\_\_\_ /

Prénom et nom de la mère :

Tel :

Nom de l'enquêteur :

Date de la visite :

/\_\_ / \_\_ / \_\_ /

Village :

District :

CSPS :

\_ Village/secteur

#### Nombre d'enfants dans le ménage

Combien d'enfants de 3 mois à 10 ans vivent dans cette concession ?

Combien de ces enfants avait entre 3 et 59 mois ET ont reçu la CPS lors de la visite des relais communautaires / distributeurs ? (rappel)

Combien de ces enfants avait entre 5 et 10 ans ET ont reçu la CPS lors de la visite des relais communautaires / distributeurs (rappel)

Demandez de contrôler la carte CPS : combien de cartes CPS vous observez (enfants traités, par carte)

Combien de ces cartes sont pour des enfants entre 3 et 59 mois ?

Combien de ces cartes sont pour des enfants entre 5 et 10 ans ?

#### Caractéristiques de l'enfant sélectionné pour l'enquête CPS

L'enfant est-il présent ? 1 ☐ Oui 2 ☐ Non Si Non, Motif absence .....

Lieu .....

Nb d'années dans le village ? |\_\_| Années Ou de mois |\_\_| Mois

L'enfant est-il résident ? 1 ☐ Oui 2 ☐ Non (vécu 6 mois ou intention de rester pendant au moins six mois)

Nom et Prénom de celle (ou celui) qui s'occupe de l'enfant \_\_\_\_\_ Sexe

|\_\_| M/F Âge |\_\_|\_\_| années

1=Mère, 2=Père, 3=Sœur, 4=Grand-mère, 5=Tante, 6=Autre:

Quelle est la relation avec l'enfant ? |\_\_|

Statut matrimonial : 1 ☐ Marié(e) 2 ☐ Célibataire 3 ☐ Veuve 4 ☐ Divorcée

Cette personne a-t-elle été à l'école coranique ? 1 ☐ Oui 2 ☐ Non si oui, combien d'années d'école au total? |\_\_|\_\_| Années

Cette personne a-t-elle été à l'école française? 1 ☐ Oui 2 ☐ Non

si oui, combien d'années d'école au total? |\_\_| |\_\_| Années ou Niveau d'étude / \_\_\_\_\_/

### **Connaissances sur le paludisme**

Comment attrape-t-on le paludisme ? (Plusieurs réponses possibles) 1 ☐ Le vent 2 ☐ La pluie 3 ☐

Les moustiques 4 ☐ les saletés 5 ☐ Les esprits 9 ☐ Autres à préciser : .....

Quels sont les signes du paludisme ? (Plusieurs réponses possibles) 1 ☐ Les maux de tête 2 ☐ Les frissons et les sueurs 3 ☐ Les Vomissements 4 ☐ La toux 5 ☐ Le corps chaud

9 ☐ Autres à préciser : .....

Peut – on mourir du paludisme ? 1 ☐ Oui 2 ☐ Non 3 ☐ Nsp

Votre enfant a-t-il eu le paludisme ces deux dernières semaines ? |\_\_| Oui /Non /NSP si oui, a-t-il pris un traitement |\_\_| Oui /Non /NSP

|  |  |  |  |
|--|--|--|--|
|  |  |  |  |
|--|--|--|--|

si oui, où l'a-t-il pris 1, 2, 3, 4, 5, 6, 7, 8,9,

1 : à la maison 2 : case de santé 3 : poste de santé 4 : centre de santé 5 : hôpital 6 : boutique 7 : pharmacie 8 : marché hebdomadaire 9 : guérisseur

### **Renseignements sur l'utilisation des moustiquaires**

L'enfant dort-il d'habitude sous une moustiquaire ? |\_\_| Oui /Non/NSP, quelle est la dernière fois

qu'il a dormi sous moustiquaire : jours |\_\_| semaines |\_\_| Mois |\_\_| JAMAIS |\_\_|

Pendant la saison des pluies dort-il sous moustiquaire : Toutes les nuits |\_\_| la plupart des nuits |\_\_| quelques nuits |\_\_| jamais |\_\_|

L'enfant a-t-il dormi sous moustiquaire la nuit dernière ? |\_\_| Oui /Non/Nsp

D'où vient la moustiquaire ? Achetée |\_\_| Etat |\_\_| ONG |\_\_| Si oui lequel \_\_\_\_\_

Cette moustiquaire a-t-elle été traitée d'insecticide au moins 1 fois lors les 12 derniers mois? |\_\_|

Oui/ Non/ Nsp

Si Non : Moustiquaire de n'importe quel type ? |\_\_| Oui /Non/Nsp Moustiquaire

imprégné ? |\_\_| Oui /Non/Nsp Milda ? |\_\_| Oui /Non/Nsp

Cette moustiquaire Est-elle intacte (<5 trous) ? |\_\_| Oui/Non

### **Renseignements sur la CPS:**

Avez-vous entendu parler de la CPS? 1 ☐ Oui 2 ☐ Non

Si Oui, à quelle occasion ? 1 ☐ Au centre de santé 2 ☐ A la radio 3 ☐ A la télévision

4. Par votre voisin 5-Agent de santé communautaire, 6- Leaders locaux ; 7 Leaders religieux (église/mosquée) ; 8 Affiches et dépliants ; 9 ☐ Autres à préciser : .....

A quoi sert-elle ? 1 ☐ Protège contre le paludisme 2 ☐ Protège contre les moustiques 3 ☐

Baisse la fièvre 4 ☐ Je ne sais pas 9 ☐ Autres à préciser :.....

Les médicaments de CPS, peuvent-ils donner des réactions secondaires aux enfants? 1 ☐ Oui

2 ☐ Non

L'enfant a-t-il reçu au moins un cycle de CPS ? 1 ☐ Oui 2 ☐ Non Si Non motif :

/ \_\_\_\_\_ /

L'enfant a-t-il reçu les 4 cycles de CPS? 1 ☐ Oui 2 ☐ Non Si Non motif :

/ \_\_\_\_\_ /

|   |                                                                                                                                                                                                                                                                                                                                                                    |
|---|--------------------------------------------------------------------------------------------------------------------------------------------------------------------------------------------------------------------------------------------------------------------------------------------------------------------------------------------------------------------|
| A | <b>Si non, pourquoi ?</b><br>1 Responsable de l'enfant et enfant absents lors de la visite<br>2 Mari absent donc impossible d'avoir sa permission<br>3 Refus d'administrer le médicament à l'enfant<br>4 Ménage non visité par les agents de santé communautaires<br>5 L'enfant était malade<br>6 L'enfant est allergique aux médicaments<br>7 Toute autre réponse |
| B | <b>Si refus, pourquoi ?</b><br>1 Mari absent donc impossible d'avoir sa permission<br>2 Le partenaire a refusé<br>3 Médicaments dangereux<br>4 Raison religieuse<br>5 Toute autres réponses                                                                                                                                                                        |

Si non, cocher le cycle non reçu par l'enfant 1 ☐ 2 ☐ 3 ☐ 4 ☐

L'enfant était-il présent lors de l'administration de CPS au mois de Oct/Nov? 1 ☐ Oui 2 ☐ Non

Si Non motif : / \_\_\_\_\_ /

A- t-il été nécessaire de recueillir l'aval d'une tierce personne avant administration de CPS à l'enfant ?

1 ☐ Oui 2 ☐ Non

Si Oui, qui est cette personne ? 1 ☐ Mère 2 ☐ Père 3 ☐ Sœur 4 ☐ Grand-mère 5 ☐ Tante

6 ☐

Autre à préciser :.....

L'enfant a-t-il la Carte CPS ? 1 ☐ Oui 2 ☐ Non Si Non, une carte CPS lui a-t-elle été délivrée ?

1 ☐ Oui 2 ☐ Non 3 ☐ Nsp

Mentionnez (et vérifier aussi sur la carte) si les traitements CPS ont été reçus chaque mois et si cela n'a pas été le cas, demandez la raison

| Mois   | Traitement                                                                                                                                             |
|--------|--------------------------------------------------------------------------------------------------------------------------------------------------------|
| Juliet | 1 <input type="checkbox"/> Oui 2 <input type="checkbox"/> Non 3 <input type="checkbox"/> Nsp si non, précisez la raison  __ <br>1, 2, 3, 4, 5, 6, 7, 8 |

|                  |                                                                                                                        |                                |
|------------------|------------------------------------------------------------------------------------------------------------------------|--------------------------------|
| <b>Août</b>      | 1 <input type="checkbox"/> Oui 2 <input type="checkbox"/> Non 3 <input type="checkbox"/> Nsp<br>1, 2, 3, 4, 5, 6, 7, 8 | si non, précisez la raison  __ |
| <b>Septembre</b> | 1 <input type="checkbox"/> Oui 2 <input type="checkbox"/> Non 3 <input type="checkbox"/> Nsp<br>1, 2, 3, 4, 5, 6, 7, 8 | si non, précisez la raison  __ |
| <b>Octobre</b>   | 1 <input type="checkbox"/> Oui 2 <input type="checkbox"/> Non 3 <input type="checkbox"/> Nsp<br>1, 2, 3, 4, 5, 6, 7, 8 | si non, précisez la raison  __ |
| <b>Novembre</b>  | 1 <input type="checkbox"/> Oui 2 <input type="checkbox"/> Non 3 <input type="checkbox"/> Nsp<br>1, 2, 3, 4, 5, 6, 7, 8 | si non, précisez la raison  __ |

1=enfant absent mais dans le village, 2=enfant en voyage, 3= Enfant présent mais mère ou tutrice absente, 4=enfant trop malade 5=réaction adverse lors de la précédente administration 6=enfant trop jeune, 7=refus des parents, 9=autre, spécifiez

Si les parents avaient refusé : spécifier la raison du

refus\_\_\_\_\_

### Renseignements sur l'Observance des 2<sup>ème</sup> et 3<sup>ème</sup> dose de CPS

Lors de la dernière administration de médicaments (Oct/Nov) avez-vous donner la 2<sup>ème</sup> ou 3<sup>ème</sup> dose à votre enfant ? 1 ☐ Oui 2 ☐ Non

Si non, spécifier la raison pour la 2<sup>ème</sup> dose : 1 ☐ oubli 2 ☐ vomissement 3 ☐ refus

9 ☐ Autres spécifier : ..... ... Lors de la dernière

administration de médicaments (Oct/Nov) avez-vous donner la 3<sup>ème</sup> dose à votre enfant ? 1 ☐ Oui  
2 ☐ Non

Si non, spécifier la raison pour la 3<sup>ème</sup> dose : 1 ☐ oubli 2 ☐ vomissement 3 ☐ refus

9 ☐ Autres spécifier : .....

Avez-vous rencontré des difficultés dans l'administration des 2em et 3em doses à domicile ? ? 1 ☐

Oui 2 ☐ Non

Si oui, préciser : 1 ☐ comprimé difficile à administrer, 2 ☐ oubli de donner le comprimé 3 ☐ refus  
de l'enfant 4 ☐ vomissement de l'enfant 9 ☐ Autres, spécifier

Que faites-vous si l'enfant rejette une dose : : 1 ☐ redonner un comprimé, 2 ☐ l'amener au CSPS

3 ☐ l'amener chez l'ASC 9 ☐ Autres spécifier .....

Que faites-vous si l'enfant vomit une dose : : 1 ☐ redonner un comprimé, 2 ☐ amener au CSPS

3 ☐ l'amener chez l'ASC 9 ☐ Autres spécifier .....

Votre enfant avait eu-il eu une réaction indésirable suite à la prise de médicaments ? 1 ☐ Oui 2 ☐

Non 3 ☐ Nsp

Si oui, lesquels ? : 1 ☐ Fièvre/corps chaud 2 ☐ Diarrhée 3 ☐ Eruption cutanée 4 ☐

Vomissement 5 ☐ Perte de l'appétit 6 ☐ Jaunisse 7 ☐ Toux 8 ☐ Prurit 9 ☐ Autres à  
préciser

Qu'avez- vous fait lors de la survenue d'évènement indésirable ? 1 ☐ l'amener au CSPS 2 ☐

l'amener chez l'ASC 3 ☐ Autre

Etes-vous prêts à accepter que votre enfant prenne la CPS l'année prochaine ? 1 ☐ Oui 2 ☐ Non

3 ☐ Nsp

Si Non, pourquoi .....
