# Supplementary material for: Factors Influencing Second and Third Dose Observance during Seasonal Malaria Chemoprevention (SMC): A Quantitative Study in Burkina Faso, Mali and Niger
Source: MDPI journal article supplement (doi:10.3390/tropicalmed7090214), 2022-08-29

CPS-OOAS: Study area in Mali

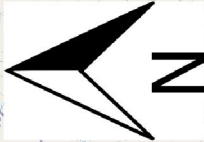

Legend

- Villages of the study
- District of Kadiolo
- District of Kati
- District of Sikasso
- District of Tomianian
- District of Yorosso

Source: Survey+OpenStreetMap

Author: Amal DAHOUNTO

Date: 2020/08/19

0 50 100 150 200 km

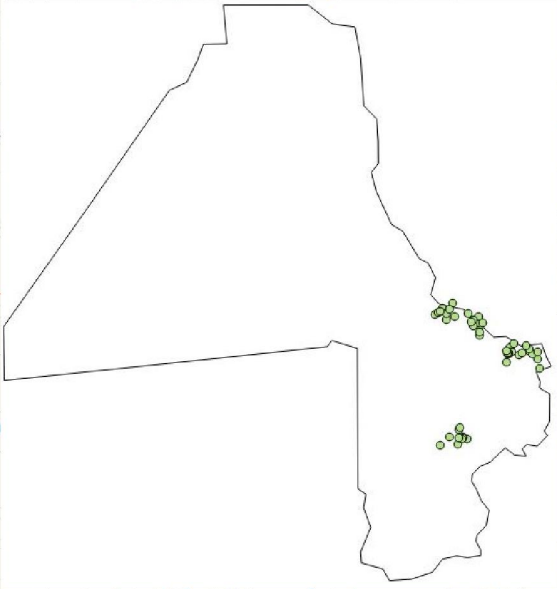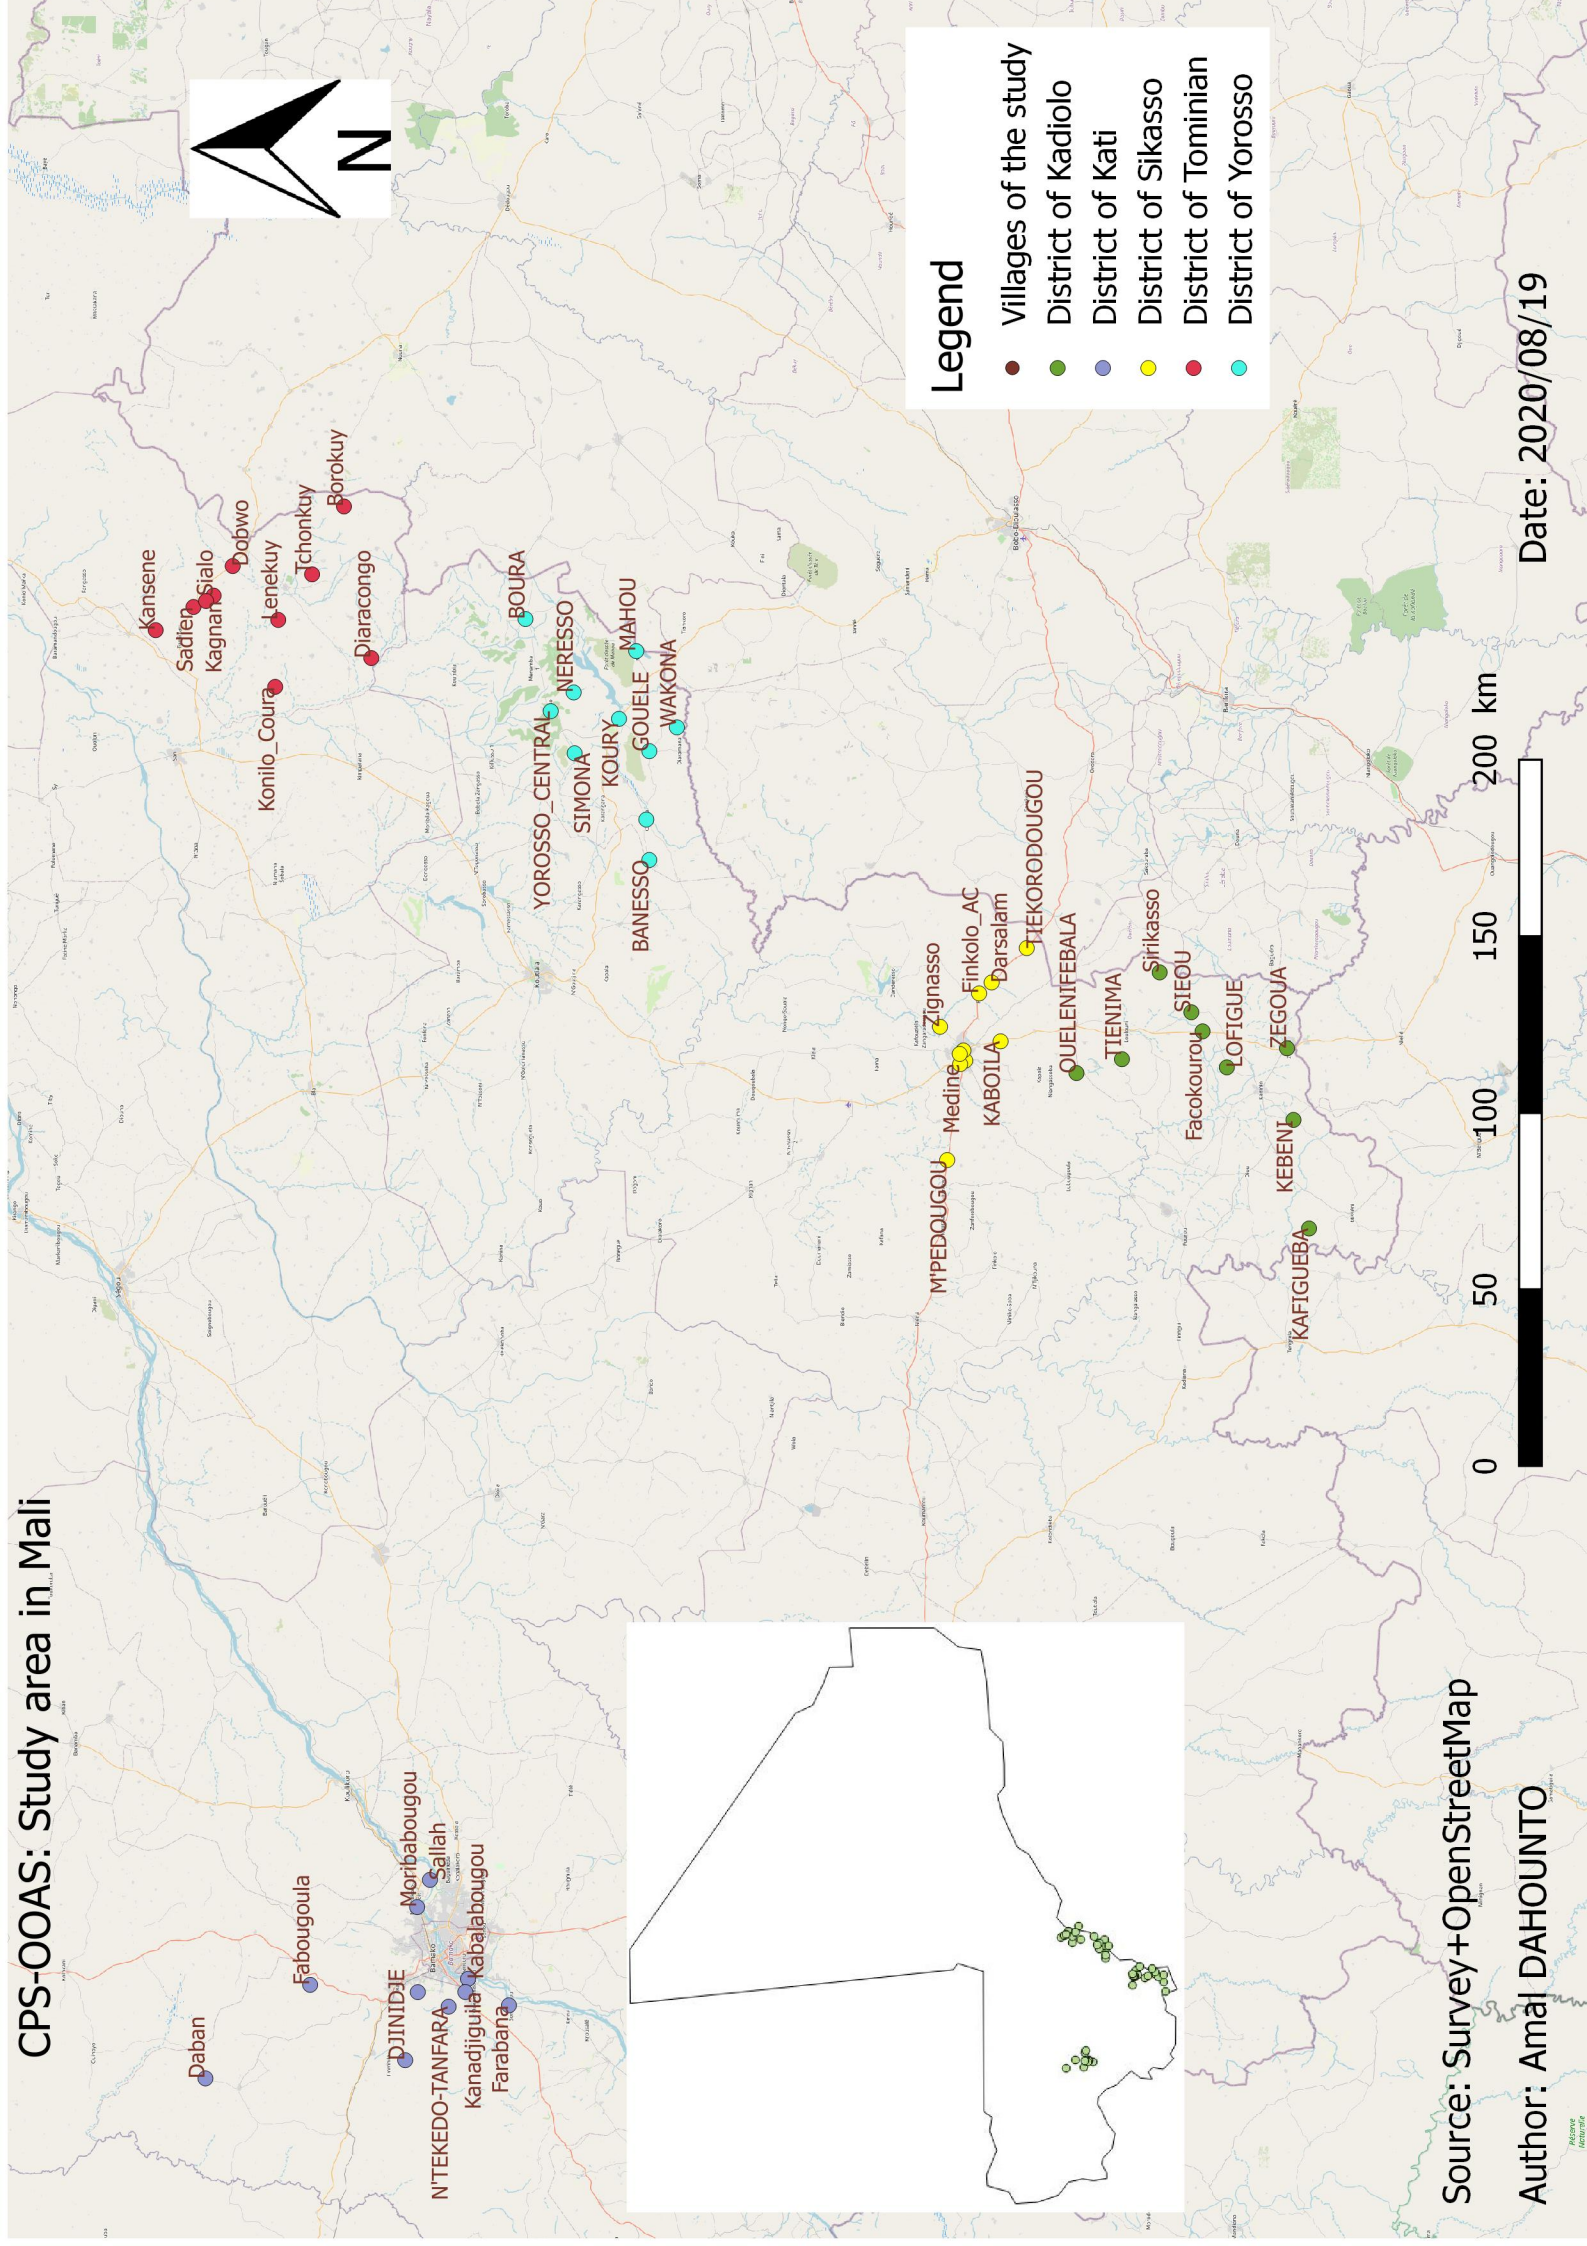

Supplement: s1 [file s1]
