# Supplementary figures and images for: Factors Influencing Second and Third Dose Observance during Seasonal Malaria Chemoprevention (SMC): A Quantitative Study in Burkina Faso, Mali and Niger
Source: MDPI journal article supplement (doi:10.3390/tropicalmed7090214), 2022-08-29

CPS-OOAS: Study area in Niger

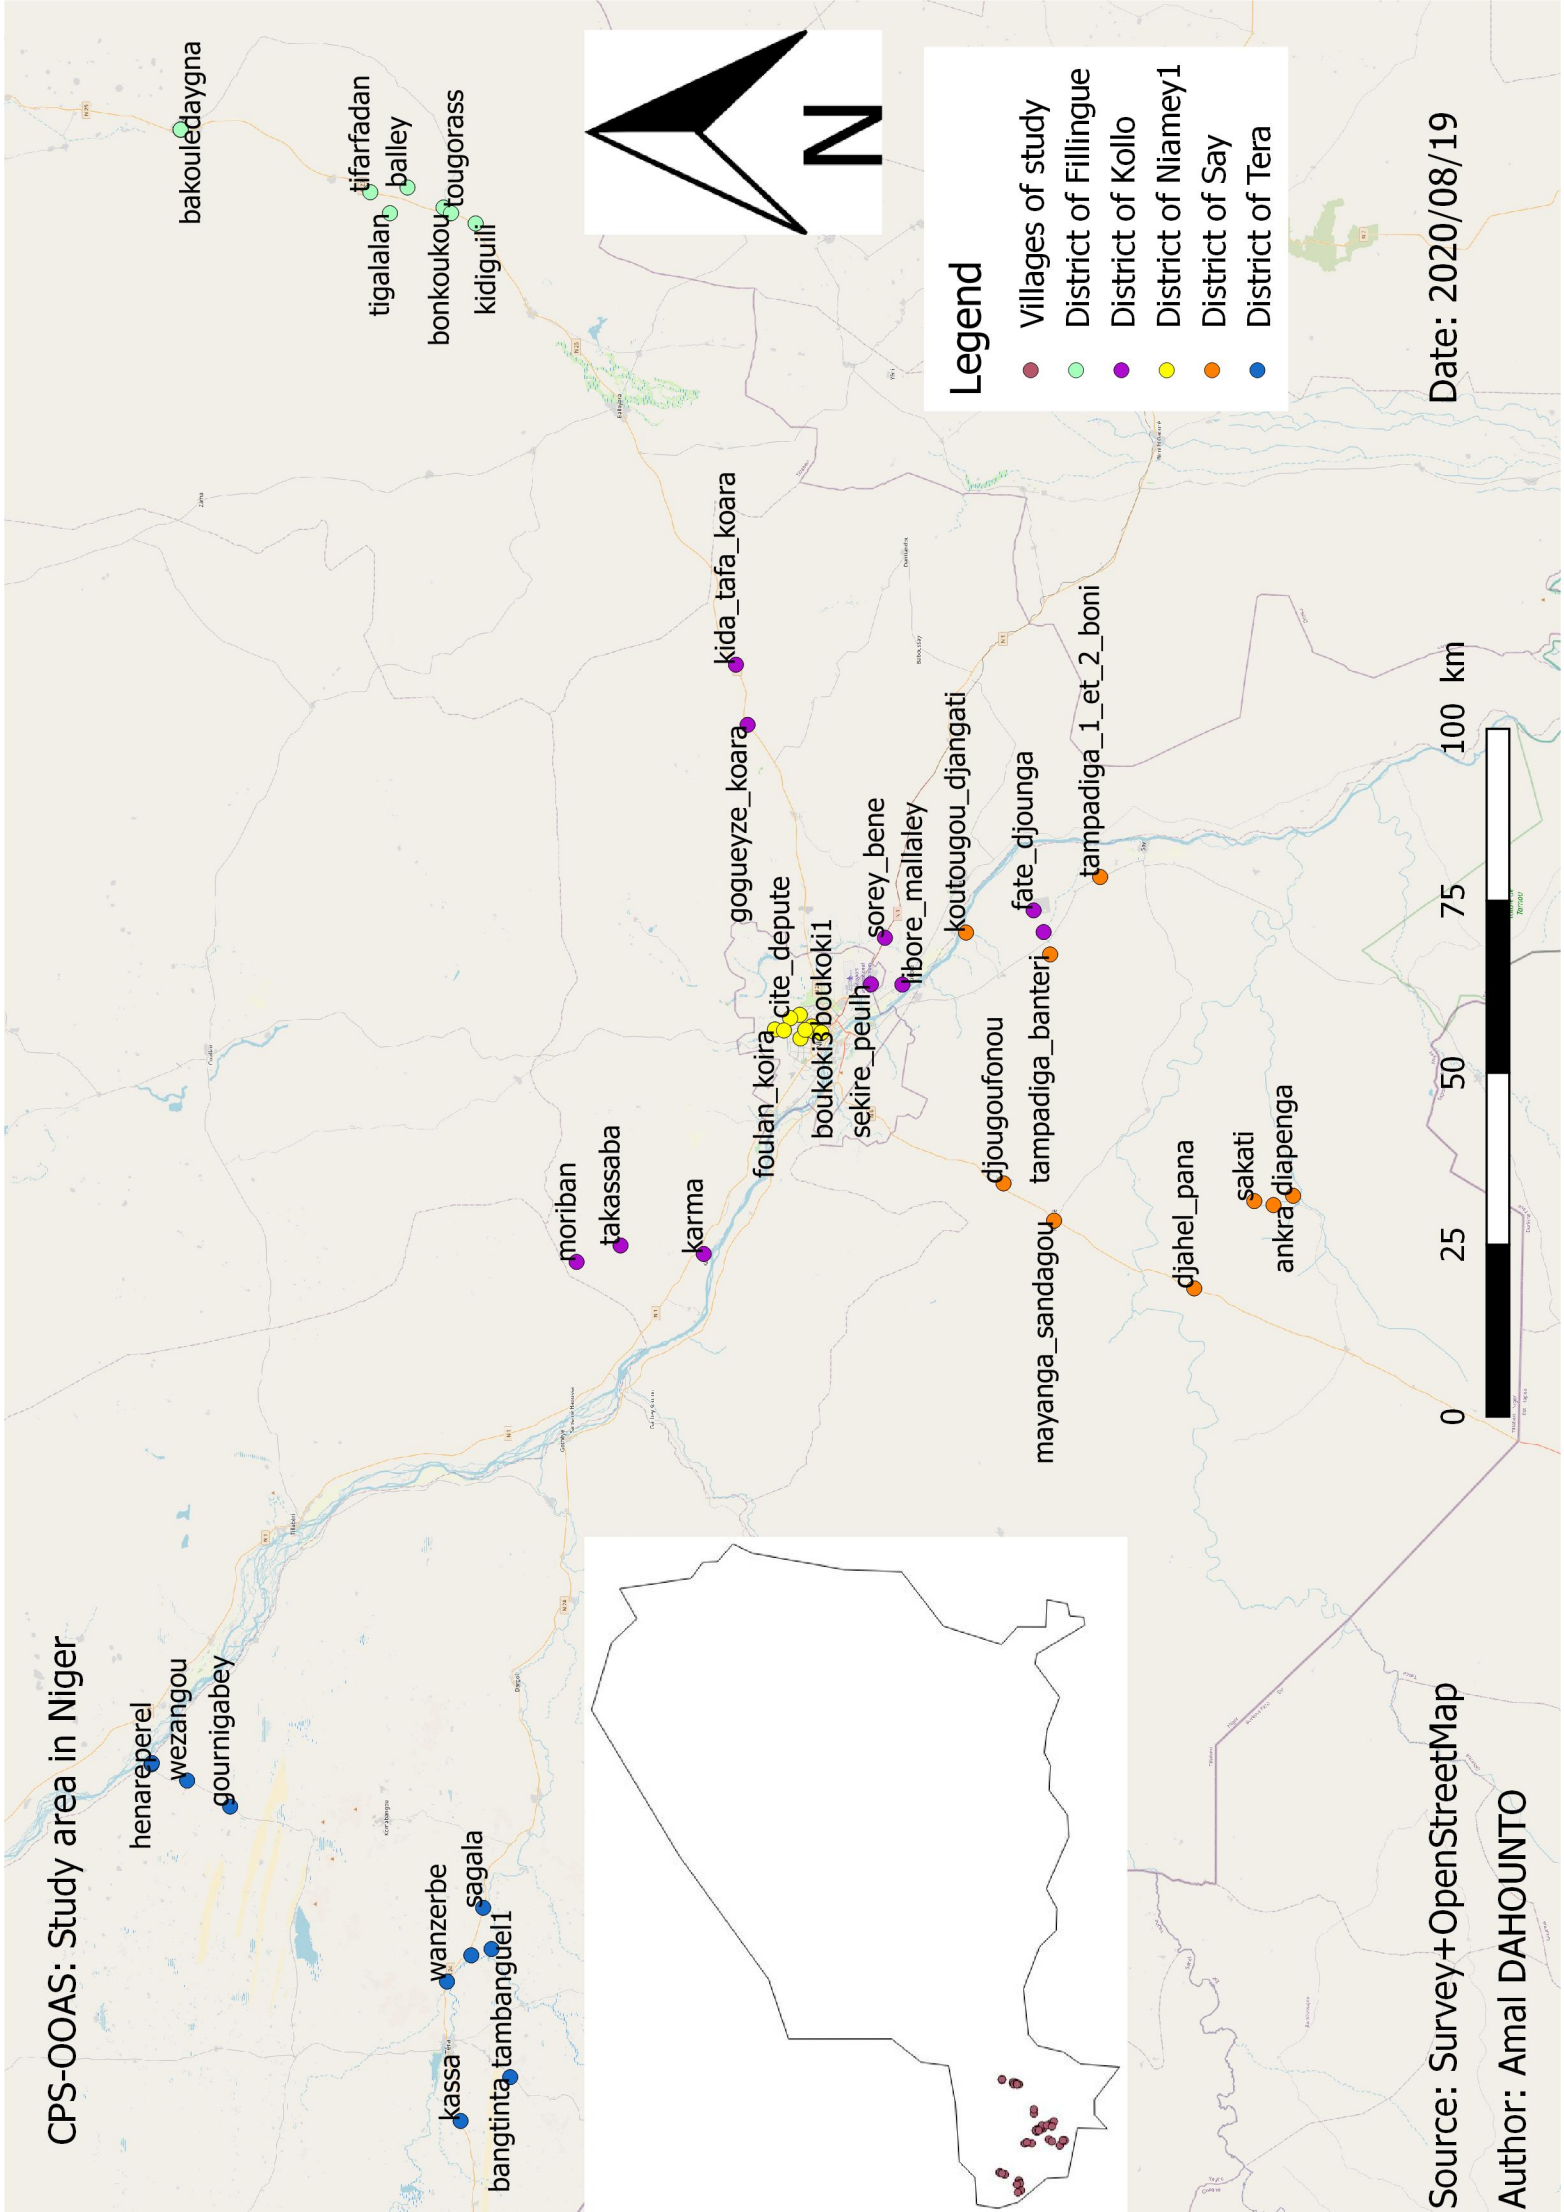

Source: Survey+OpenStreetMap

Author: Amal DAHOUNTO

Date: 2020/08/19

Supplement: s1 [file s1]

# CPS-OOAS: Study area in Burkina Faso

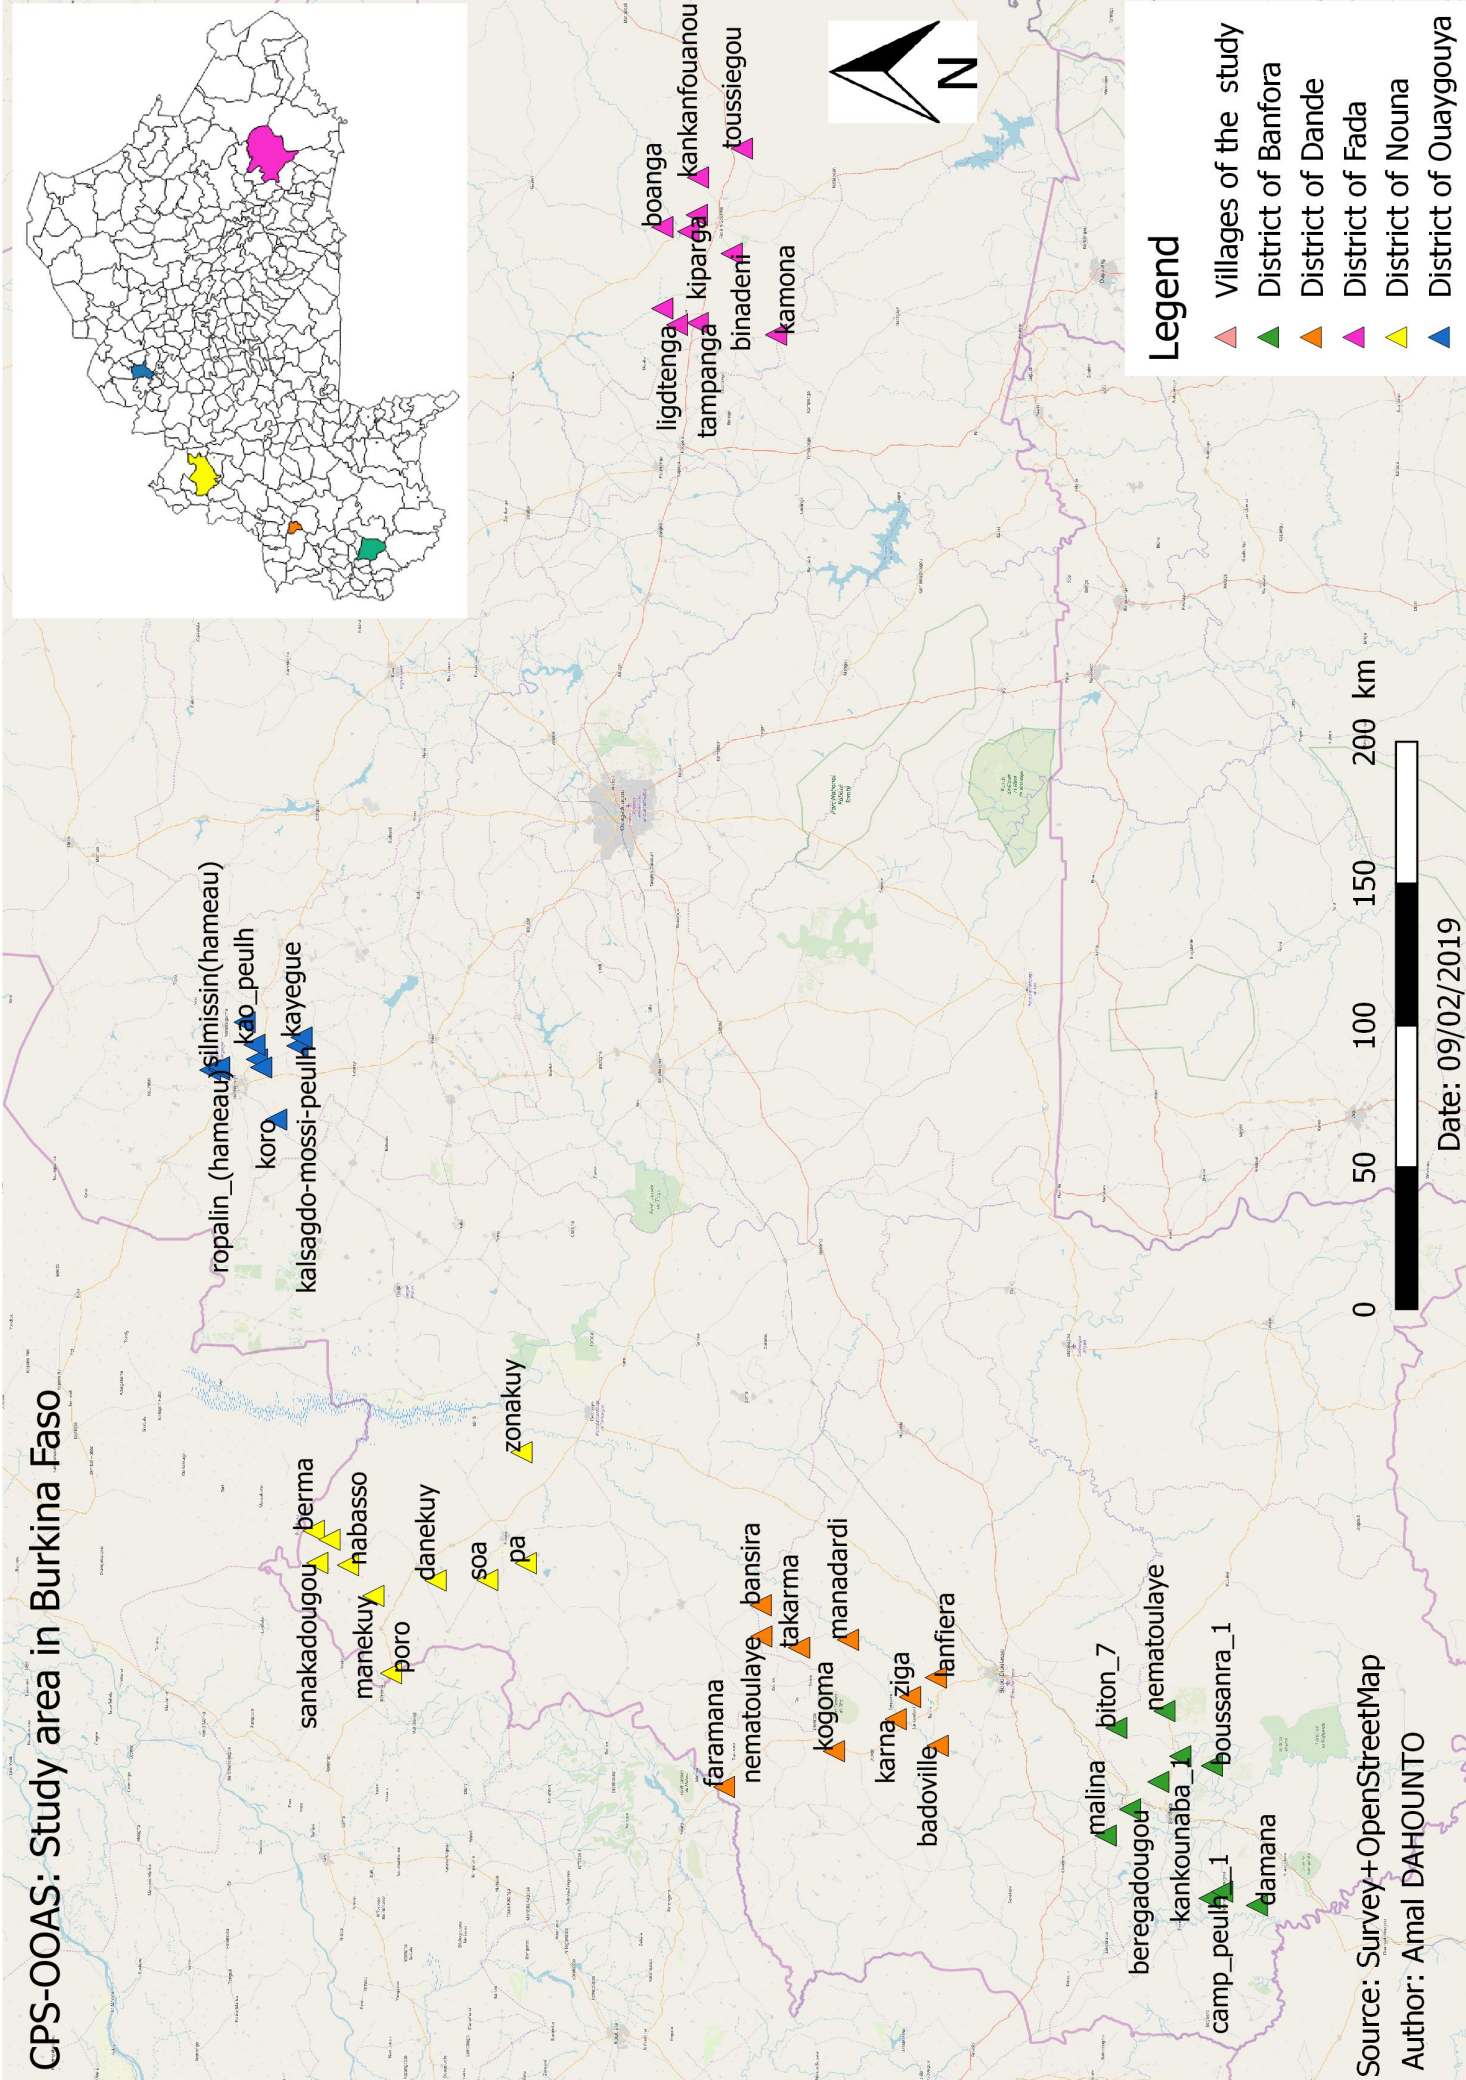

Source: Survey+OpenStreetMap

Author: Amal DAHOUNTO

Supplement: s1 [file s1]
